# Supplementary material for: Improved stability of perovskite solar cells in ambient air by controlling the mesoporous layer
Source: Royal Society of Chemistry journal article supplement (doi:10.1039/c5ta02843d), 2015-01-01
Supplement: c5ta02843d1.pdf [file c5ta02843d1.pdf]

## Supporting Information for:

# Improved stability of perovskite solar cells in ambient air by controlling mesoporous layer

Jun Yin,<sup>a,b</sup> Jing Cao,<sup>b</sup> Xu He,<sup>a</sup> Shangfu Yuan,<sup>b</sup> Shibo Sun,<sup>a</sup> Jing Li,<sup>\*a,c</sup> Nanfeng Zheng,<sup>\*b</sup> and Liwei Lin<sup>c</sup>

<sup>a</sup> Pen-Tung Sah Institute of Micro-Nano Science and Technology, Xiamen University, Xiamen, 361005, China. E-mail: lijing@xmu.edu.cn; Tel: +86-592-2181340.

<sup>b</sup> State Key Laboratory for Physical Chemistry of Solid Surfaces, Collaborative Innovation Center of Chemistry for Energy Materials, and Department of Chemistry, College of Chemistry and Chemical Engineering, Xiamen University, Xiamen 361005, China. E-mail: nfzheng@xmu.edu.cn; Fax: +86-592-2183047.

<sup>c</sup> Department of Mechanical Engineering, University of California, Berkeley, CA 94720, United States.

## 1. Experimental details

### Solar cell fabrication:

Fluorine doped tin oxide (FTO) glasses (NSG, 14 Ω) were ultrasonically cleaned by ethanol and acetone for 20 min sequentially, and then treated by O<sub>2</sub> plasma for 6 min. The compact TiO<sub>2</sub> (c-TiO<sub>2</sub>) film was formed by spin-coating 0.15 M titanium diisopropoxide bis (acetylacetonate) (75 wt% in isopropanol, TCI) in *n*-butanol on the FTO substrates at 2500 rpm for 30 s, then dried at 125 °C for 10 min and annealed at 550 °C in air for 30 min. After that, the substrates were immersed in 40 mM TiCl<sub>4</sub> aqueous solution for 30 min at 70 °C and washed with distilled water, followed by annealing at 500 °C for 30 min in air. The m-TiO<sub>2</sub> layer was deposited by spin coating a commercial TiO<sub>2</sub> paste (Dyesol 18NRT) diluted in ethanol (1:5, weight ratio) at 5000 rpm for 30 s, and annealed at 500 °C for 30 min. To control the thickness of m-TiO<sub>2</sub> layer, different spin-coating times were introduced. The perovskite film was prepared using the widely used two-step method: PbI<sub>2</sub> solution (1 M) in N, N-dimethylformamide (DMF) was spin-cast on the m-TiO<sub>2</sub> layer followed by immersing in CH<sub>3</sub>NH<sub>3</sub>I solution and the subsequent thermal treatment. The hole-transporting material (HTM) layer was then deposited by spin coating a solution of spiro-MeOTAD (Lumtech) at 4000 rpm for 30 s. Finally, 80 nm-thick gold electrodes were deposited by electron beam

evaporation through a shadow mask. All of the devices were fabricated under ambient air with humidity about 50% and then stored in dry air environment without sealing and maintaining the humidity of ~15% before measurements.

**Device characterization:**

Absorption spectra of perovskite films were recorded using a Shimadzu UV 2550 UV-Visible spectrophotometer. The morphologies were investigated using a field-emission scanning electron microscopy (SEM) (Hitachi S-4800), and the crystallinity of the perovskite films was characterized by an X-ray diffraction (XRD) (Rigaku Ultima IV) with Cu  $K\alpha$  radiation in a  $2\theta$  range of 10 - 35°. Photovoltaic  $J-V$  measurements were performed under AM 1.5G illumination at the intensity of 100 mW cm<sup>-2</sup> using a 300 W Xenon solar simulator (Newport) equipped with a Keithley 2420 source meter. The incident photon to electron conversion efficiency (IPCE) was measured using a power source (Newport, 300 W xenon lamp, 66920) with a monochromator (Newport, Cornerstone 260) and an optical power meter (Newport, 2936-R). Electrochemical impedance spectra (EIS) measurements were carried out on CHI660 under 1 sun illumination with different DC bias voltage from 0.4 to 1.0 V. A small AC voltage perturbation of 10 mV was applied during the measurement at frequency ranging from 1 Hz to 1 MHz. The spectra were fitted using Z-View software. The time-resolved PL (TRPL) spectra were recorded on a fluorescence spectrometer (FLS980, Edinburgh Photonics) excited by picosecond pulsed diode lasers (375 nm).

## 2. Cross-section morphology of the perovskite films

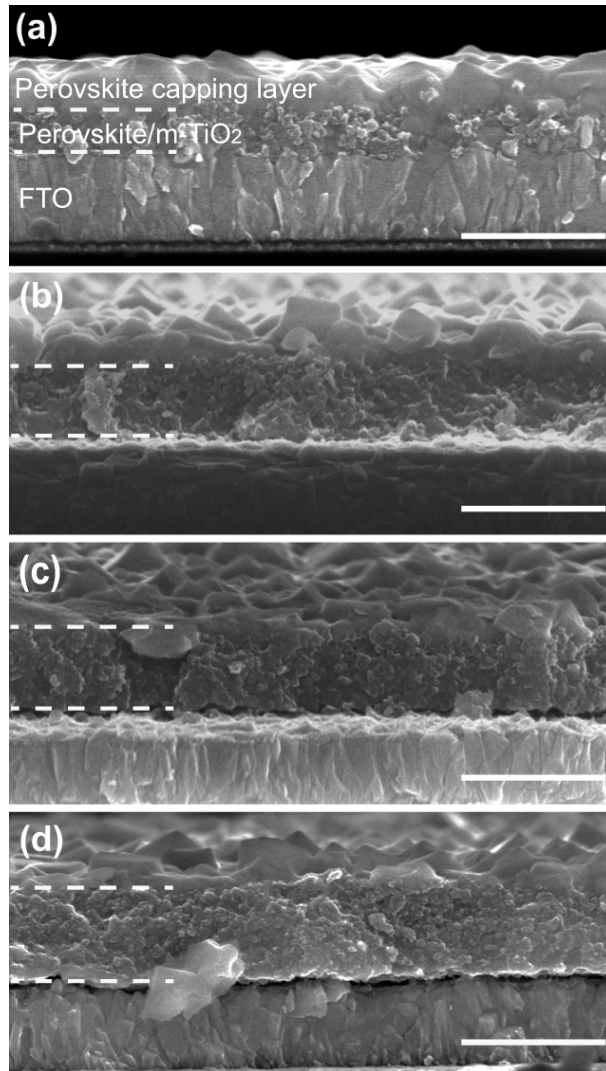

**Figure S1.** Cross-section SEM images of the perovskite films on different thicknesses of m-TiO<sub>2</sub> layer by changing spin-coating times: (a) 1 time, (b) 2 times, (c) 3 times and (d) 4 times. Scale bar represents 500 nm.

### 3. Histogram of PCE for samples with 160-nm thick m-TiO<sub>2</sub> layer

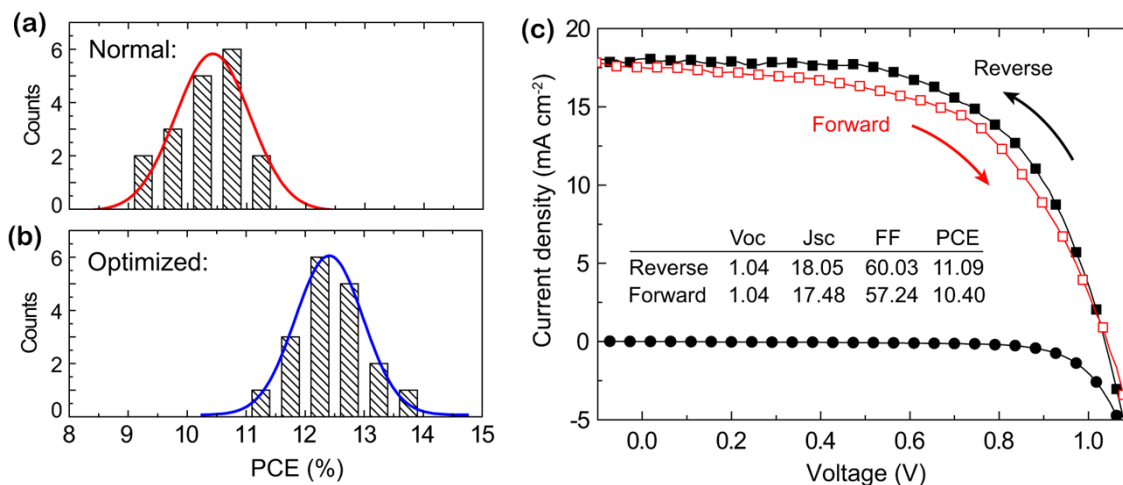

**Figure S2.** Histogram of solar cell efficiency of 18 samples (a) without and (b) with optimization. In this work, the most efficient cells were realized on the devices configured by m-TiO<sub>2</sub> with the thickness of ~160 nm and achieved the PCE of 11.09% (10.43% in average), as shown in (a). With optimized perovskite layer, 13.76% PCE (12.41% in average) can be obtained as shown in (b). (c)  $J$ - $V$  curves measured by reverse- and forward-scan for a typical device configured with 160 nm-thick m-TiO<sub>2</sub> layer. The scan rate was 150 mV/s.

### 4. IPCE spectra for the devices with different thickness of m-TiO<sub>2</sub> layer

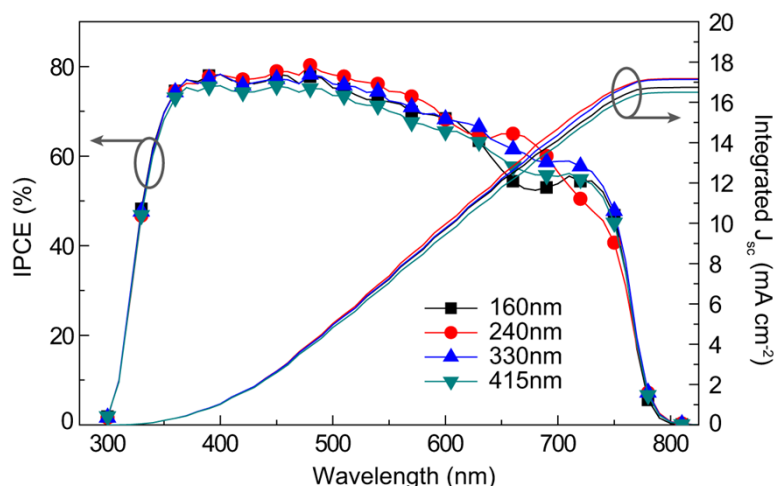

**Figure S3** m-TiO<sub>2</sub>-thickness dependence of the IPCE response for the perovskite solar cells. The integrated photocurrent density  $J_{sc}$  from IPCE spectra was also shown in the figure with a value of 16.74, 17.19, 17.12, and 16.51 mA cm<sup>-2</sup> for the device with 160, 240, 330 and 415 nm-thick m-TiO<sub>2</sub> layer, respectively. The integrated  $J_{sc}$  from IPCE matched well with the J-V measurement results, and also undergo a slight increase and then decrease trend.

## 5. Electrochemical impedance spectra (EIS) measurement

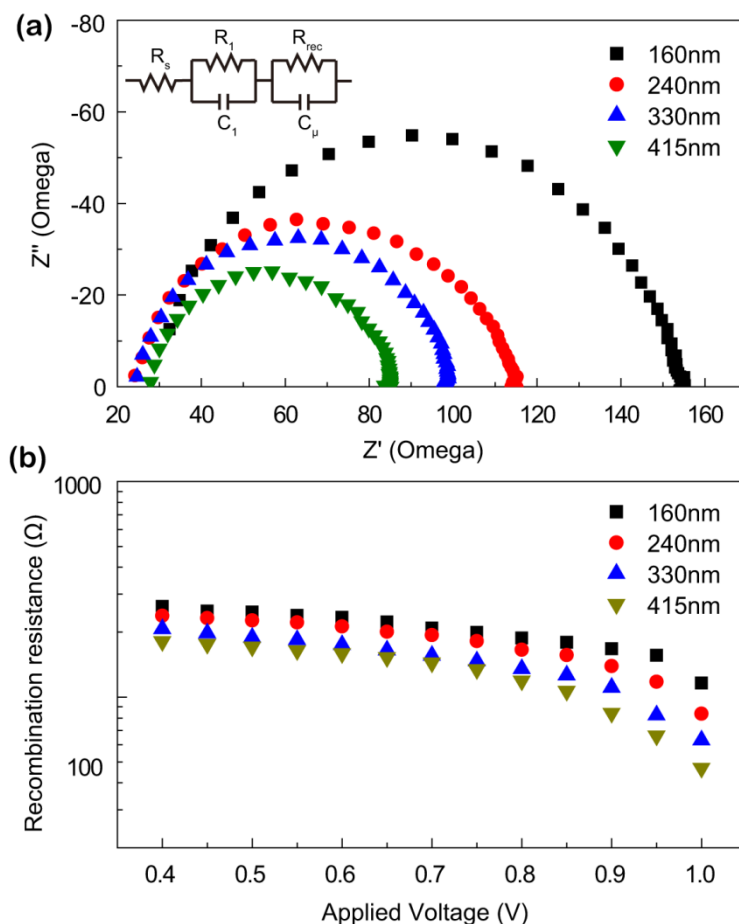

**Figure. S4** (a) EIS of the cells with different thickness of m-TiO<sub>2</sub> layer under AM 1.5G illumination (100 mW cm<sup>-2</sup>) and 1.0 V bias. (b) Recombination resistance ( $R_{rec}$ ) estimated from the EIS measurements as a function of the applied voltage (0.4 - 1.0 V) to the devices. The EIS spectra is fitted using transmission line model<sup>1</sup> and  $R_{rec}$  is extracted and plotted as a function of the applied voltage bias. Equivalent circuit is shown in inset of (a).  $R_l$  and  $C_l$  represent the hole transport resistance and capacitance through the hole transport material (HTM) layer.

## 6. Long-term PCE stability of the devices

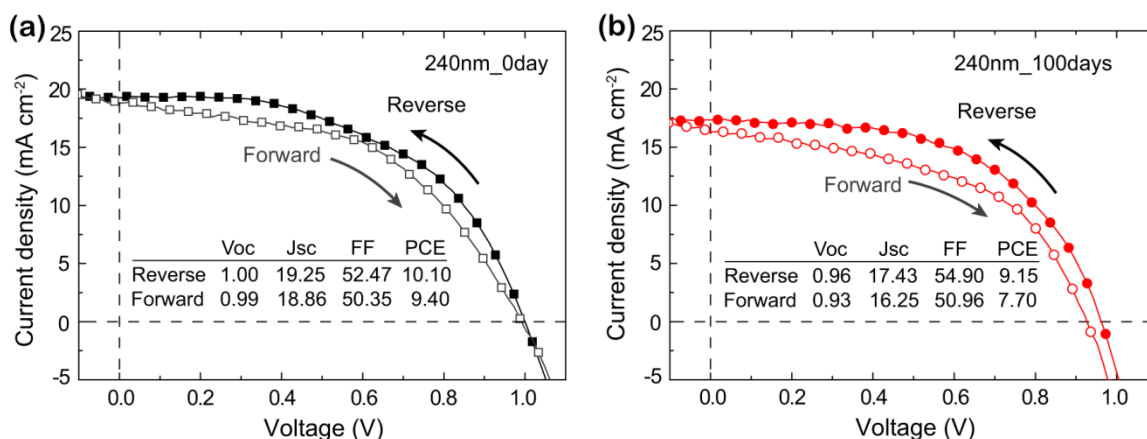

**Figure S5.** (a) and (b) show the  $J$ - $V$  curves for the same device with 240-nm- $m$ - $\text{TiO}_2$  layer that measured immediately and after 100 days of ageing, respectively. The PV parameters measured by reverse- and forward-scan are summarized in inset. The devices were stored in air ambient with controlled humidity of  $\sim 15\%$  and without sealing. A maximum of 9.15% PCE still can be obtained on this structure even after 100 days ( $\sim 2400$  hours).

## 7. Time-resolved PL (TRPL) measurement

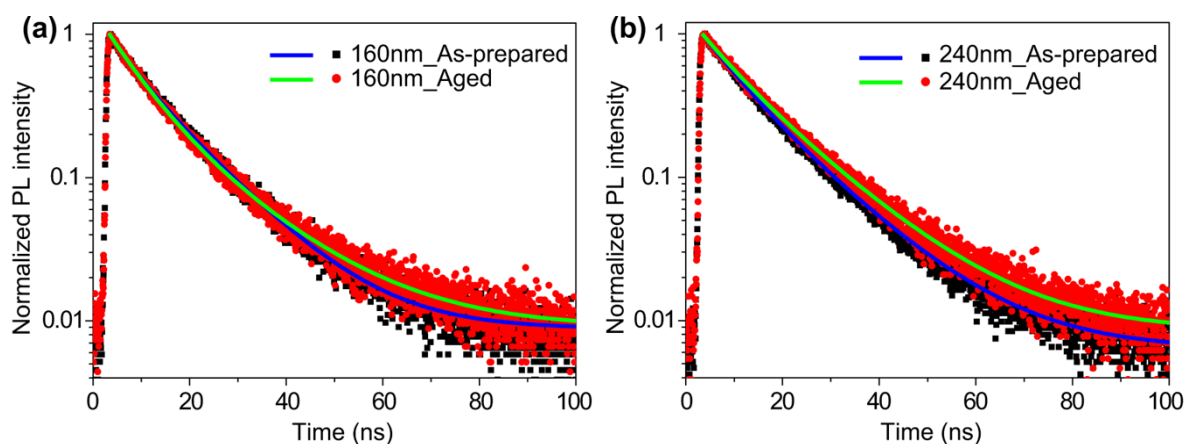

**Figure S6.** Time-resolved photoluminescence (TRPL) spectra of the perovskite films configured with (a) 160 nm- and (b) 240 nm- thick  $m$ - $\text{TiO}_2$  layer before and after aging (7 days) in air under controlled humidity ( $\sim 15\%$ ).

In order to further evaluate the charges transportation process for the cells with different thickness of  $m$ - $\text{TiO}_2$  layer after aging, time-resolved photoluminescence (TRPL) were carried out to determine the carriers' lifetime in perovskite film as shown in Figure S6. The curves can

be well fitted using two-component exponential decay and the results were summarized in Table S1. According to the previous report,<sup>2,3</sup> the fast decay component ( $\tau_1$ ) should attribute to the injection of free carriers in the perovskite crystals to the charges collection materials, while the longer part ( $\tau_2$ ) should be the recombination of free carriers in the radiative channel.

As demonstrated by Wang *et al.*,<sup>4</sup> the slowed injection rates ( $1/\tau_1$ ) was undoubtedly originated from the increased PbI<sub>2</sub> grains in the perovskite layer for all of the aged samples. The longer recombination lifetimes ( $\tau_2$ ) also indicates the increased carriers' accumulation effect in perovskite layer induced by more generated PbI<sub>2</sub> after aging for the cells.<sup>3</sup> However, less slowed recombination lifetime for the PSCs with thicker m-TiO<sub>2</sub> layer after aging was presented. This demonstrated that a better charges transportation process still can be maintained, which is consistent with the photocurrent response measurement. These results well support the decay mechanisms mentioned in the manuscript.

**Table S1.** Fitted TRPL parameters for the different perovskite films. The relative intensity ratio for each fraction is also shown in the table.

| Samples            | $\tau_1$ (ns) | $\tau_2$ (ns) |
|--------------------|---------------|---------------|
| 160 nm-As prepared | 4.83 (30%)    | 12.62 (70%)   |
| 160 nm-Aged        | 7.16 (48%)    | 17.35 (52%)   |
| 240 nm-As prepared | 7.18 (36%)    | 14.46 (64%)   |
| 240 nm-Aged        | 7.21 (50%)    | 15.24 (50%)   |

#### References:

1. J. Bisquert, *Journal of Physical Chemistry B*, 2002, **106**, 325-333.
2. P.-W. Liang, C.-Y. Liao, C.-C. Chueh, F. Zuo, S. T. Williams, X.-K. Xin, J. Lin and A. K. Y. Jen, *Adv. Mater.*, 2014, **26**, 3748-3754.
3. Q. Chen, H. Zhou, T.-B. Song, S. Luo, Z. Hong, H.-S. Duan, L. Dou, Y. Liu and Y. Yang, *Nano Lett.*, 2014, **14**, 4158-4163.
4. L. Wang, C. McCleese, A. Kovalsky, Y. Zhao and C. Burda, *J. Am. Chem. Soc.*, 2014, **136**, 12205-12208.
